# Supplementary material for: Potential use of bacterial community succession for estimating post-mortem interval as revealed by high-throughput sequencing
Source: PubMed Central journal article supplement (PMC4823735; doi:10.1038/srep24197), 2016-04-07
Supplement: srep24197-s1.pdf [file srep24197-s1.pdf]

# Potential use of bacterial community succession for estimating post-mortem interval as revealed by high-throughput sequencing

Juanjuan Guo<sup>1</sup>, Xiaoliang Fu<sup>1</sup>, Huidan Liao<sup>1</sup>, Zhenyu Hu<sup>2</sup>, Lingling Long<sup>1</sup>, Weitao Yan<sup>1</sup>, Yanjun Ding<sup>1</sup>, Lagabaiyila Zha<sup>1</sup>, Yadong Guo<sup>1</sup>, Jie Yan<sup>1</sup>, Yunfeng Chang<sup>1</sup>, Jifeng Cai<sup>1\*</sup>

## Supplementary Table S1

Succession of sarcosaphagous insects attracted to the various stages of exposed rat carcasses in Changsha.

| Order      | Family         | Species                            | Fresh |   |   | Bloated |   |   | Active |   |   | Advanced |   |   | Dry |   |   |
|------------|----------------|------------------------------------|-------|---|---|---------|---|---|--------|---|---|----------|---|---|-----|---|---|
|            |                |                                    | A     | L | E | A       | L | E | A      | L | E | A        | L | P | A   | L | P |
| Diptera    | Calliphoridae  | <i>Lucilia cuprina</i>             | √     |   |   | √       | √ | √ | √      | √ | √ | √        | √ |   |     | √ | √ |
|            |                | <i>Lucilia sericata</i>            | √     |   |   | √       | √ | √ | √      | √ | √ | √        | √ |   |     | √ | √ |
|            |                | <i>Chrysomya pinguis</i>           | √     |   |   | √       |   | √ | √      | √ |   | √        | √ |   |     | √ | √ |
|            |                | <i>Hemipyrellia ligurriens</i>     |       |   |   |         |   |   | √      |   |   | √        |   |   |     |   |   |
|            |                | <i>Achoerandrus rufifacies</i>     | √     |   |   | √       |   | √ | √      |   | √ | √        |   |   |     | √ | √ |
|            | Sarcophagidae  | <i>Boettcherisca peregrine</i>     |       |   |   | √       |   |   | √      |   |   |          |   |   |     |   |   |
|            |                | <i>Parasarcophaga crassipalpis</i> |       |   |   |         |   |   | √      |   |   | √        |   |   |     |   |   |
|            |                | <i>Phallosphaera gravelyi</i>      |       |   |   | √       |   |   | √      |   |   | √        |   |   |     |   |   |
|            | Muscidae       | <i>Musca domestica</i>             | √     |   |   | √       |   |   | √      |   |   | √        |   |   |     | √ |   |
|            |                | <i>Hydrotaea chalcogaster</i>      |       |   |   |         |   |   | √      |   |   | √        |   |   |     | √ |   |
| Phoridae   | <i>Unident</i> |                                    |       |   | √ |         |   | √ | √      |   |   | √        |   |   |     | √ |   |
| Coleoptera | Staphylinidae  | <i>Creophilus maxillosus</i>       |       |   |   |         |   |   |        |   |   | √        |   |   | √   |   |   |
|            | Silphidae      | <i>Calosilpha brunneicollis</i>    |       |   |   |         |   |   | √      |   |   | √        |   |   | √   |   |   |
|            | Nitidulidae    | <i>Omosita discoidea</i>           |       |   |   |         |   |   |        |   |   | √        |   |   | √   |   |   |
|            | Dermestidae    | <i>D. maculatus</i> Degeer         |       |   |   |         |   |   |        |   |   |          |   |   | √   |   |   |

A, adult; L, larva; E; egg; P, pupa.

## Supplementary Table S2

Numbers of adult dipterans collected at different stages of decomposition from exposed rat carcasses

| Family        | Species                            | Fresh | Bloated | Active | Advanced | Dry |
|---------------|------------------------------------|-------|---------|--------|----------|-----|
| Calliphoridae | <i>Lucilia cuprina</i>             | 6     | 11      | 24     | 27       | 0   |
|               | <i>Lucilia sericata</i>            | 4     | 17      | 20     | 19       | 7   |
|               | <i>Chrysomya pinguis</i>           | 7     | 15      | 13     | 21       | 0   |
|               | <i>Hemipyrellia ligurriens</i>     | 0     | 0       | 8      | 15       | 0   |
|               | <i>Achoerandrus ruffifacies</i>    | 13    | 23      | 27     | 31       | 0   |
| Sarcophagidae | <i>Boettcherisca peregrine</i>     | 0     | 2       | 2      | 1        | 0   |
|               | <i>Parasarcophaga crassipalpis</i> | 0     | 0       | 2      | 4        | 0   |
|               | <i>Phallosphaera graveleyi</i>     | 0     | 4       | 5      | 5        | 0   |
| Muscidae      | <i>Musca domestica</i>             | 5     | 9       | 7      | 11       | 2   |
|               | <i>Hydrotaea chalcogaster</i>      | 0     | 0       | 5      | 5        | 4   |
| Phoridae      | <i>Unident</i>                     | 0     | 10      | 26     | 0        | 0   |

### Supplementary Table S3

Genera with significantly different abundance in the buccal cavity between the sarcosaphagous insect exclusion group (group A) and the sarcosaphagous insect access group (group B).

| <b>Taxa</b>           | <b>mean abundance (group A)</b> | <b>mean abundance (group B)</b> | <b>p value</b> |
|-----------------------|---------------------------------|---------------------------------|----------------|
| <i>Escherichia</i>    | 0.0015649                       | 0.0054790                       | 0.0091         |
| <i>Wautersiella</i>   | 0.0000120                       | 0.0009286                       | 0.0163         |
| <i>Collinsella</i>    | 0.0000120                       | 0.0001703                       | 0.0463         |
| <i>Deinococcus</i>    | 0.0000963                       | 0                               | 0.0114         |
| <i>Methylocaldum</i>  | 0.0000843                       | 0                               | 0.0209         |
| Dok59                 | 0.0000963                       | 0                               | 0.0114         |
| <i>Photobacterium</i> | 0                               | 0.0000774                       | 0.0160         |
| <i>Spirochaeta</i>    | 0.0000722                       | 0                               | 0.0387         |
| SargSea-WGS           | 0                               | 0.0000774                       | 0.0160         |
| <i>Halanaerobium</i>  | 0.0001204                       | 0                               | 0.0401         |
| <i>Facklamia</i>      | 0                               | 0.0000774                       | 0.0160         |
| <i>Acholeplasma</i>   | 0.0000722                       | 0                               | 0.0387         |

#### Supplementary Table S4

Genera with significantly different abundance in the rectum between the sarcosaphagous insect exclusion group (group A) and the sarcosaphagous insect access group (group B).

| <b>Taxa</b>             | <b>mean abundance (group A)</b> | <b>mean abundance (group B)</b> | <b>p value</b> |
|-------------------------|---------------------------------|---------------------------------|----------------|
| <i>Stenotrophomonas</i> | 0.0000542                       | 0.0005237                       | 0.0005         |
| <i>Anaerovibrio</i>     | 0.0204442                       | 0.0032864                       | 0.0402         |
| <i>Sutterella</i>       | 0.0018310                       | 0.0088299                       | 0.0432         |
| <i>Thiobacillus</i>     | 0                               | 0.0000903                       | 0.0074         |
| <i>Wautersiella</i>     | 0                               | 0.0001625                       | 0.0013         |
| <i>Collinsella</i>      | 0.0012026                       | 0.0004695                       | 0.0338         |
| <i>Bifidobacterium</i>  | 0.0000542                       | 0.0001806                       | 0.0469         |
| <i>Sulfurimonas</i>     | 0                               | 0.0000722                       | 0.0198         |
| <i>Clostridium</i>      | 0.0001733                       | 0                               | 0.0129         |
| <i>Adlercreutzia</i>    | 0.0000975                       | 0                               | 0.0169         |
| <i>Caulobacter</i>      | 0.0000867                       | 0                               | 0.0289         |
| <i>Lachnospira</i>      | 0                               | 0.0000722                       | 0.0198         |

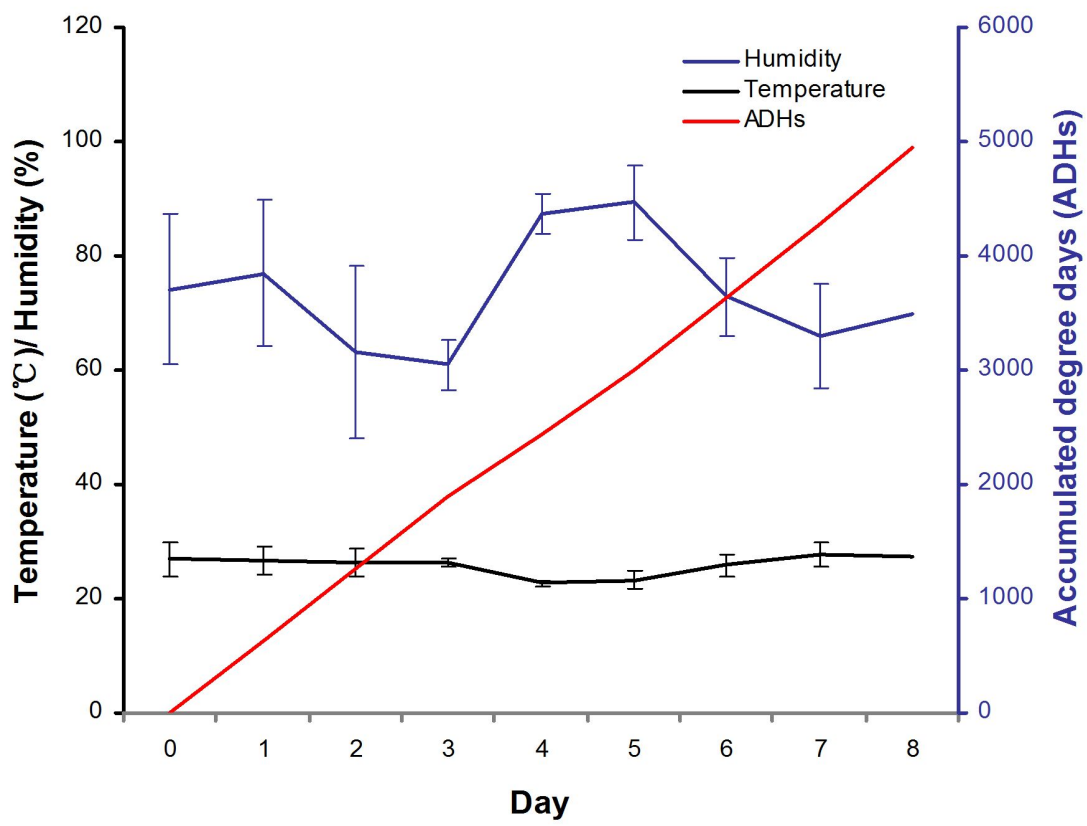

**Supplementary Figure S1**

Average daily temperature (°C), humidity (%) and accumulated degree hours (ADHs) during the experiment

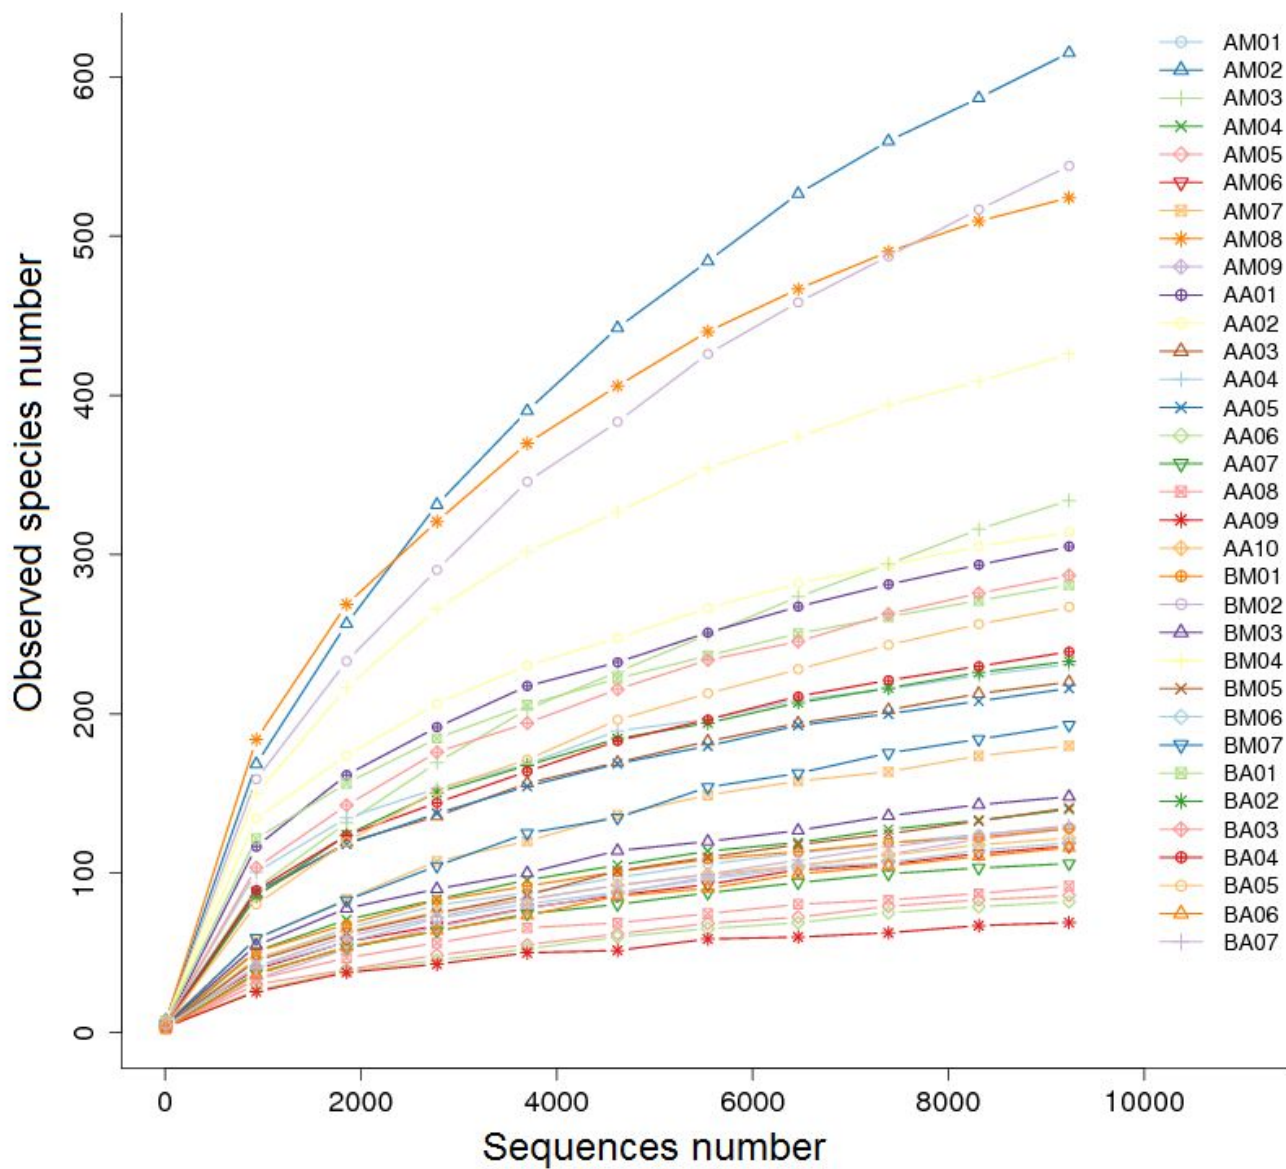

**Supplementary Figure S2**

Rarefaction curves of observed species number clustered at 97% sequence identity across all samples. Sample names refer to samples as described in Table 1.

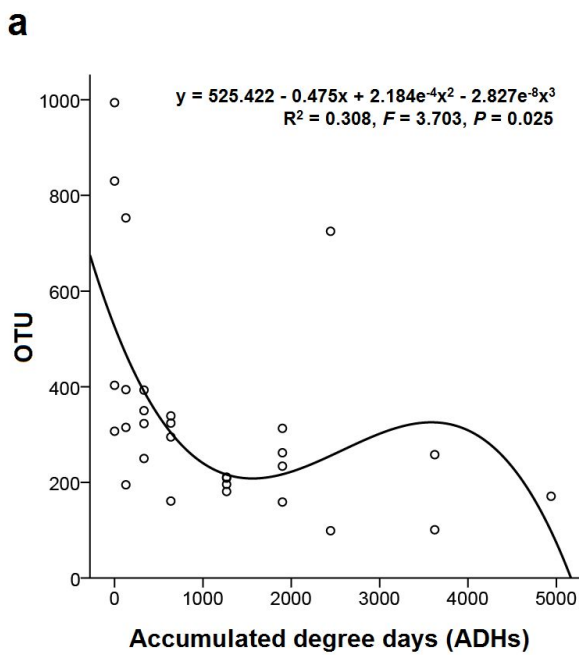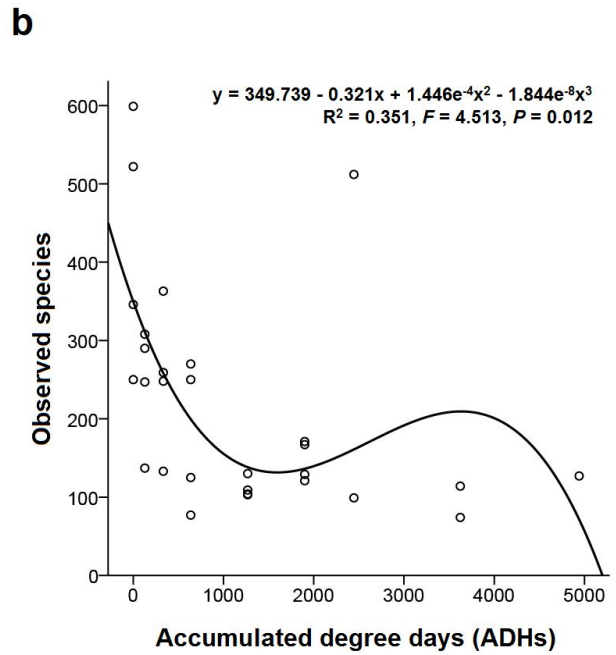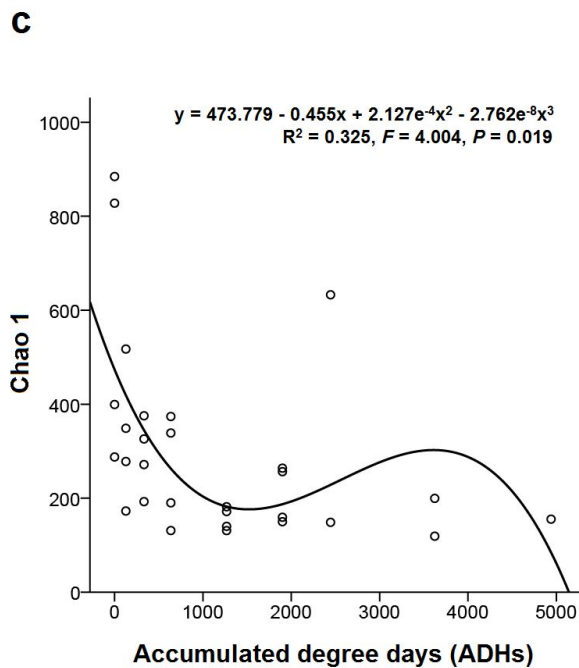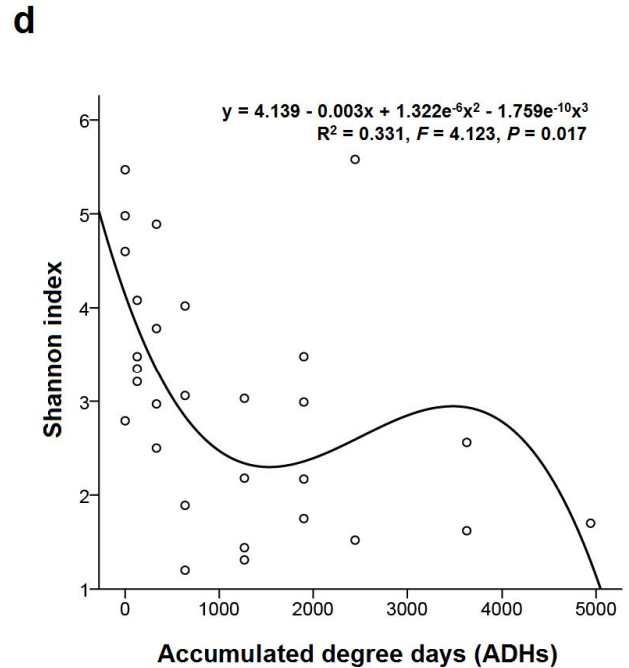

### Supplementary Figure S3

Non-linear regression curves of operational taxonomic unit (OTU) richness (a), observed species index (b), Chao1 index (c) and Shannon index (d) during decomposition. Each open circle represents the bacterial community of a single sampling body site (i.e., buccal cavity or rectum) from rat carcasses.

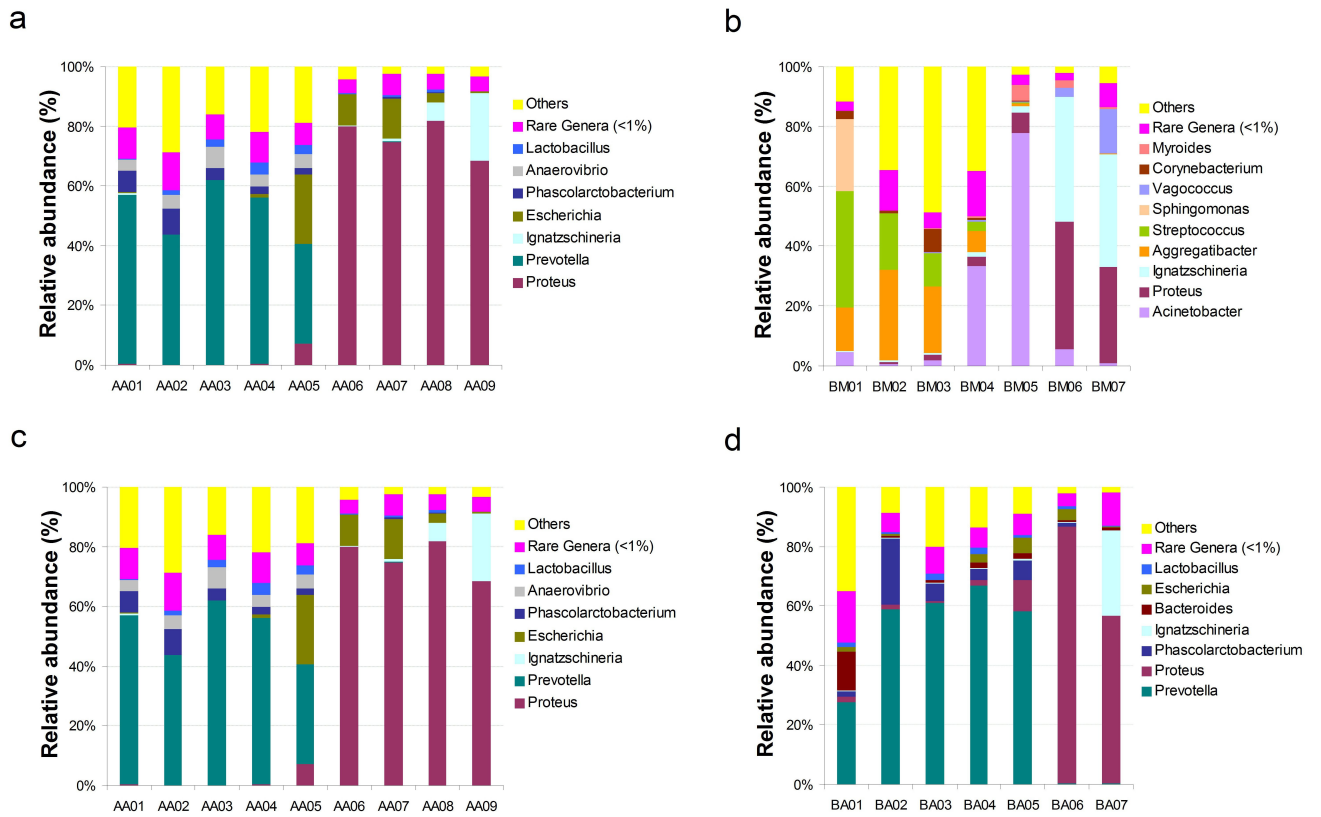

### Supplementary Figure S4

Bacterial community structure variation during decomposition at the genus level. Relative abundance of bacterial genera during decomposition in the buccal cavity in group A (a), buccal cavity in group B (b), rectum in group A (c) and rectum in group B (d). Sample names refer to samples as described in Table 1.



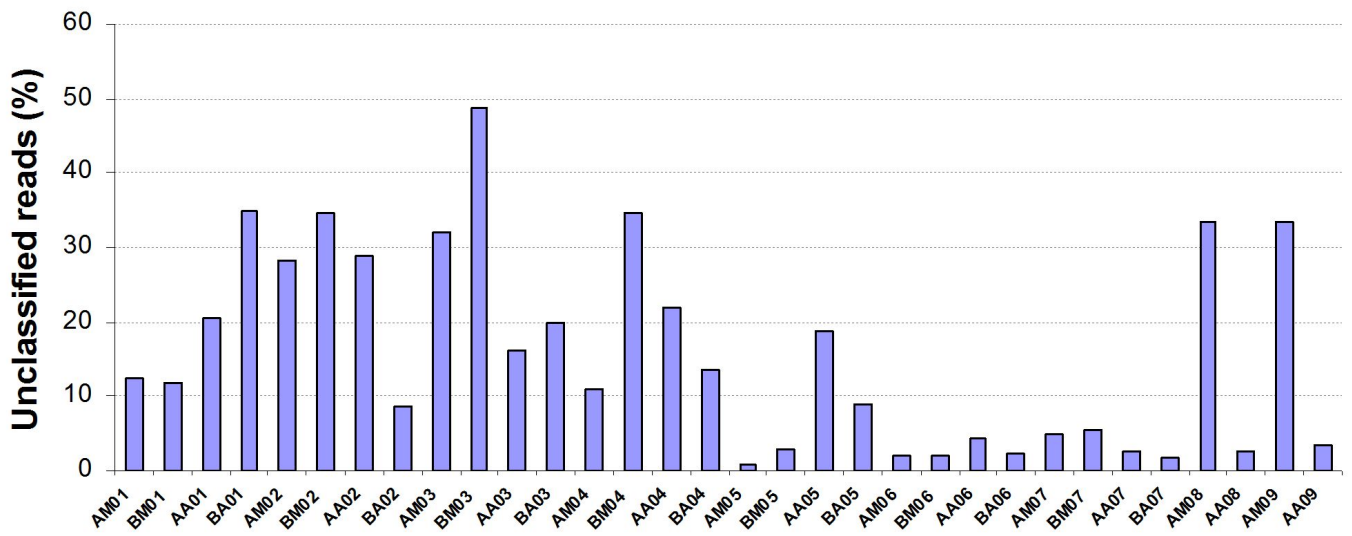

**Supplementary Figure S5**

Proportion of the unclassified reads in different samples. Sample names refer to samples as described in Table 1.
